# Supplementary material for: Comparative Metabolomic Profiling of Horse Gram (Macrotyloma uniflorum (Lam.) Verdc.) Genotypes for Horse Gram Yellow Mosaic Virus Resistance
Source: MDPI journal article supplement (doi:10.3390/metabo13020165), 2023-01-23
Supplement: s1 [file s1]

Supplementary Table S1. Grouping of horse gram germplasm with respect to HgYMV infestation

| S.No      | Genotype | PDI         | Rating | Group | S.No      | Genotype | PDI   | Rating | Group | S.No      | Genotype | PDI   | Rating | Group |
|-----------|----------|-------------|--------|-------|-----------|----------|-------|--------|-------|-----------|----------|-------|--------|-------|
| <b>1</b>  | PLS 6001 | 47.50       | 7      | S     | <b>26</b> | PLS 6040 | 46.75 | 7      | S     | <b>51</b> | PLS 6080 | 33.75 | 6      | S     |
| <b>2</b>  | PLS 6002 | <b>1.42</b> | 1      | HR    | <b>27</b> | PLS 6041 | 39.50 | 7      | S     | <b>52</b> | PLS 6081 | 48.50 | 7      | S     |
| <b>3</b>  | PLS 6003 | 46.25       | 7      | S     | <b>28</b> | PLS 6043 | 17.00 | 5      | MS    | <b>53</b> | PLS 6082 | 18.75 | 5      | MS    |
| <b>4</b>  | PLS 6004 | 19.75       | 5      | MS    | <b>29</b> | PLS 6046 | 48.00 | 7      | S     | <b>54</b> | PLS 6083 | 48.75 | 7      | S     |
| <b>5</b>  | PLS 6005 | 18.75       | 5      | MS    | <b>30</b> | PLS 6047 | 12.50 | 4      | MR    | <b>55</b> | PLS 6085 | 42.50 | 7      | S     |
| <b>6</b>  | PLS 6006 | 19.50       | 5      | MS    | <b>31</b> | PLS 6048 | 18.75 | 5      | MS    | <b>56</b> | PLS 6088 | 37.50 | 7      | S     |
| <b>7</b>  | PLS 6007 | 18.75       | 5      | MS    | <b>32</b> | PLS 6049 | 29.25 | 6      | S     | <b>57</b> | PLS 6089 | 18.75 | 5      | MS    |
| <b>8</b>  | PLS 6008 | 12.00       | 4      | MR    | <b>33</b> | PLS 6050 | 48.75 | 7      | S     | <b>58</b> | PLS 6090 | 17.00 | 5      | MS    |
| <b>9</b>  | PLS 6009 | 18.75       | 5      | MS    | <b>34</b> | PLS 6051 | 17.00 | 5      | MS    | <b>59</b> | PLS 6092 | 12.25 | 4      | MR    |
| <b>10</b> | PLS 6013 | 12.00       | 4      | MR    | <b>35</b> | PLS 6052 | 43.00 | 7      | S     | <b>60</b> | PLS 6094 | 48.75 | 7      | S     |
| <b>11</b> | PLS 6014 | 12.25       | 4      | MR    | <b>36</b> | PLS 6059 | 37.50 | 7      | S     | <b>61</b> | PLS 6095 | 66.25 | 7      | S     |
| <b>12</b> | PLS 6015 | 46.25       | 7      | S     | <b>37</b> | PLS 6060 | 12.50 | 4      | MR    | <b>62</b> | PLS 6097 | 19.25 | 5      | MS    |
| <b>13</b> | PLS 6016 | 19.00       | 5      | MS    | <b>38</b> | PLS 6061 | 43.75 | 7      | S     | <b>63</b> | PLS 6099 | 32.00 | 6      | S     |
| <b>14</b> | PLS 6019 | 18.75       | 5      | MS    | <b>39</b> | PLS 6062 | 18.75 | 5      | MS    | <b>64</b> | PLS 6102 | 37.50 | 7      | S     |
| <b>15</b> | PLS 6021 | 17.00       | 5      | MS    | <b>40</b> | PLS 6063 | 18.75 | 5      | MS    | <b>65</b> | PLS 6103 | 46.25 | 7      | S     |
| <b>16</b> | PLS 6023 | 18.75       | 5      | MS    | <b>41</b> | PLS 6064 | 19.25 | 5      | MS    | <b>66</b> | PLS 6104 | 18.00 | 5      | MS    |
| <b>17</b> | PLS 6025 | 15.75       | 5      | MS    | <b>42</b> | PLS 6066 | 43.75 | 7      | S     | <b>67</b> | PLS 6105 | 16.75 | 5      | MS    |
| <b>18</b> | PLS 6030 | 19.00       | 5      | MS    | <b>43</b> | PLS 6068 | 39.25 | 7      | S     | <b>68</b> | PLS 6106 | 18.75 | 5      | MS    |
| <b>19</b> | PLS 6033 | 40.00       | 7      | S     | <b>44</b> | PLS 6069 | 42.50 | 7      | S     | <b>69</b> | PLS 6107 | 12.50 | 4      | MR    |
| <b>20</b> | PLS 6034 | 16.00       | 5      | MS    | <b>45</b> | PLS 6071 | 16.00 | 5      | MS    | <b>70</b> | PLS 6109 | 43.75 | 7      | S     |
| <b>21</b> | PLS 6035 | 18.25       | 5      | MS    | <b>46</b> | PLS 6072 | 48.75 | 7      | S     | <b>71</b> | PLS 6110 | 16.00 | 5      | MS    |
| <b>22</b> | PLS 6036 | 18.75       | 5      | MS    | <b>47</b> | PLS 6073 | 41.00 | 7      | S     | <b>72</b> | PLS 6111 | 17.00 | 5      | MS    |
| <b>23</b> | PLS 6037 | 16.00       | 5      | MS    | <b>48</b> | PLS 6074 | 17.00 | 5      | MS    | <b>73</b> | PLS 6112 | 46.25 | 7      | S     |
| <b>24</b> | PLS 6038 | 19.25       | 5      | MS    | <b>49</b> | PLS 6077 | 18.75 | 5      | MS    | <b>74</b> | PLS 6113 | 37.50 | 6      | S     |
| <b>25</b> | PLS 6039 | 11.50       | 4      | MR    | <b>50</b> | PLS 6078 | 12.50 | 4      | MR    | <b>75</b> | PLS 6114 | 18.75 | 5      | MS    |

Supplementary Table S1 Contd.,

| <b>S.No</b> | <b>Genotype</b> | <b>PDI</b> | <b>Rating</b> | <b>Group</b> | <b>S.No</b> | <b>Genotype</b> | <b>PDI</b> | <b>Rating</b> | <b>Group</b> | <b>S.No</b> | <b>Genotype</b> | <b>PDI</b> | <b>Rating</b> | <b>Group</b> |
|-------------|-----------------|------------|---------------|--------------|-------------|-----------------|------------|---------------|--------------|-------------|-----------------|------------|---------------|--------------|
| <b>76</b>   | PLS 6115        | 18.00      | 5             | MS           | <b>101</b>  | PLS 6183        | 19.50      | 5             | MS           | <b>126</b>  | PLS 6224        | 12.50      | 4             | MR           |
| <b>77</b>   | PLS6116         | 12.50      | 4             | MR           | <b>102</b>  | PLS 6184        | 33.75      | 6             | S            | <b>127</b>  | PLS 6226        | 19.00      | 5             | MS           |
| <b>78</b>   | PLS 6118        | 37.50      | 7             | S            | <b>103</b>  | PLS 6185        | 17.00      | 5             | MS           | <b>128</b>  | PLS 6227        | 12.75      | 4             | MR           |
| <b>79</b>   | PLS 6119        | 46.25      | 7             | S            | <b>104</b>  | PLS 6186        | 18.75      | 5             | MS           | <b>129</b>  | PLS 6228        | 26.25      | 6             | S            |
| <b>80</b>   | PLS 6120        | 42.50      | 7             | S            | <b>105</b>  | PLS 6190        | 19.00      | 5             | MS           | <b>130</b>  | PLS 6229        | 28.50      | 6             | S            |
| <b>81</b>   | PLS 6121        | 48.75      | 7             | S            | <b>106</b>  | PLS 6192        | 29.75      | 6             | S            | <b>131</b>  | PLS 6230        | 18.00      | 5             | MS           |
| <b>82</b>   | PLS 6125        | 19.00      | 5             | MS           | <b>107</b>  | PLS 6193        | 37.50      | 6             | S            | <b>132</b>  | PLS 6231        | 12.50      | 4             | MR           |
| <b>83</b>   | PLS 6131        | 18.75      | 5             | MS           | <b>108</b>  | PLS 6194        | 75.00      | 9             | HS           | <b>133</b>  | PLS 6232        | 16.00      | 5             | MS           |
| <b>84</b>   | PLS 6135        | 14.25      | 4             | MR           | <b>109</b>  | PLS 6196        | 41.00      | 7             | S            | <b>134</b>  | PLS 6233        | 18.75      | 5             | MS           |
| <b>85</b>   | PLS 6140        | 48.75      | 7             | S            | <b>110</b>  | PLS 6197        | 18.50      | 5             | MS           | <b>135</b>  | PLS 6234        | 12.50      | 3             | MR           |
| <b>86</b>   | PLS 6141        | 18.75      | 5             | MS           | <b>111</b>  | PLS 6199        | 26.25      | 6             | S            | <b>136</b>  | PLS 6236        | 36.25      | 7             | S            |
| <b>87</b>   | PLS 6142        | 18.75      | 5             | MS           | <b>112</b>  | PLS 6200        | 48.75      | 7             | S            | <b>137</b>  | PLS 6237        | 48.75      | 7             | S            |
| <b>88</b>   | PLS 6150        | 16.50      | 5             | MS           | <b>113</b>  | PLS 6201        | 12.50      | 4             | MR           | <b>138</b>  | PLS 6240        | 36.25      | 7             | S            |
| <b>89</b>   | PLS 6151        | 19.00      | 5             | MS           | <b>114</b>  | PLS 6202        | 46.25      | 7             | S            | <b>139</b>  | PLS 6242        | 17.00      | 5             | MS           |
| <b>90</b>   | PLS 6154        | 16.50      | 5             | MS           | <b>115</b>  | PLS 6205        | 43.75      | 7             | S            | <b>140</b>  | PLS 6244        | 48.75      | 7             | S            |
| <b>91</b>   | PLS 6161        | 29.50      | 6             | S            | <b>116</b>  | PLS 6206        | 47.50      | 7             | S            | <b>141</b>  | PLS 6245        | 12.50      | 4             | MR           |
| <b>92</b>   | PLS 6164        | 33.75      | 7             | S            | <b>117</b>  | PLS 6208        | 18.00      | 5             | MS           | <b>142</b>  | PLS 6246        | 42.50      | 7             | S            |
| <b>93</b>   | PLS 6165        | 17.00      | 5             | MS           | <b>118</b>  | PLS 6211        | 18.75      | 5             | MS           | <b>143</b>  | PLS 6247        | 13.25      | 4             | MR           |
| <b>94</b>   | PLS 6168        | 18.75      | 5             | MS           | <b>119</b>  | PLS 6212        | 12.25      | 4             | MR           | <b>144</b>  | PLS 6250        | 18.75      | 5             | MS           |
| <b>95</b>   | PLS 6169        | 33.75      | 7             | S            | <b>120</b>  | PLS 6213        | 43.75      | 7             | S            | <b>145</b>  | PLS 6251        | 42.50      | 7             | S            |
| <b>96</b>   | PLS 6172        | 46.25      | 7             | S            | <b>121</b>  | PLS 6216        | 26.25      | 6             | S            | <b>146</b>  | PLS 6252        | 26.25      | 6             | S            |
| <b>97</b>   | PLS 6175        | 26.25      | 6             | S            | <b>122</b>  | PLS 6217        | 16.00      | 5             | MS           | <b>147</b>  | PLS 6253        | 19.00      | 5             | MS           |
| <b>98</b>   | PLS 6177        | 48.75      | 7             | S            | <b>123</b>  | PLS 6218        | 17.00      | 5             | MS           | <b>148</b>  | PLS 6255        | 48.75      | 7             | S            |
| <b>99</b>   | PLS 6179        | 17.00      | 5             | MS           | <b>124</b>  | PLS 6219        | 18.50      | 5             | MS           | <b>149</b>  | PLS 6256        | 43.75      | 7             | S            |
| <b>100</b>  | PLS 6181        | 13.25      | 4             | MR           | <b>125</b>  | PLS 6221        | 18.75      | 5             | MS           | <b>150</b>  | PLS 6258        | 46.25      | 7             | S            |

Supplementary Table S1 Contd.,

| <b>S.No</b> | <b>Genotype</b> | <b>PDI</b> | <b>Rating</b> | <b>Group</b> | <b>S.No</b> | <b>Genotype</b> | <b>PDI</b> | <b>Rating</b> | <b>Group</b> | <b>S.No</b> | <b>Genotype</b> | <b>PDI</b> | <b>Rating</b> | <b>Group</b> |
|-------------|-----------------|------------|---------------|--------------|-------------|-----------------|------------|---------------|--------------|-------------|-----------------|------------|---------------|--------------|
| <b>151</b>  | PLS 6260        | 18.00      | 5             | MS           | <b>176</b>  | HG 8            | 18.75      | 5             | MS           | <b>201</b>  | HG 59           | 46.25      | 7             | S            |
| <b>152</b>  | PLS 6261        | 46.25      | 7             | S            | <b>177</b>  | HG 9            | 17.00      | 5             | MS           | <b>202</b>  | HG 61           | 22.50      | 7             | S            |
| <b>153</b>  | PLS 6262        | 18.75      | 5             | MS           | <b>178</b>  | HG 9A           | 42.50      | 7             | S            | <b>203</b>  | HG 63           | 18.00      | 5             | MS           |
| <b>154</b>  | PLS 6263        | 12.50      | 4             | MR           | <b>179</b>  | HG 12           | 46.25      | 7             | S            | <b>204</b>  | HG 67           | 12.50      | 4             | MR           |
| <b>155</b>  | PLS 6266        | 29.00      | 6             | S            | <b>180</b>  | HG 14           | 43.75      | 7             | S            | <b>205</b>  | HG 68           | 26.25      | 6             | S            |
| <b>156</b>  | PLS 6268        | 23.25      | 6             | S            | <b>181</b>  | HG 18           | 16.00      | 5             | MS           | <b>206</b>  | HG 72           | 42.50      | 7             | S            |
| <b>157</b>  | PLS 6269        | 12.50      | 4             | MR           | <b>182</b>  | HG 19           | 18.25      | 5             | MS           | <b>207</b>  | HG 78           | 44.75      | 7             | S            |
| <b>158</b>  | PLS 6270        | 23.75      | 6             | S            | <b>183</b>  | HG 21           | 48.75      | 7             | S            | <b>208</b>  | HG 79           | 19.00      | 5             | MS           |
| <b>159</b>  | PLS 6272        | 48.75      | 7             | S            | <b>184</b>  | HG 23           | 16.00      | 5             | MS           | <b>209</b>  | HG 80           | 42.50      | 7             | S            |
| <b>160</b>  | PLS 6275        | 18.75      | 5             | MS           | <b>185</b>  | HG 27           | 46.25      | 7             | S            | <b>210</b>  | HG 85           | 14.00      | 5             | MS           |
| <b>161</b>  | PLS 6278        | 12.50      | 4             | MR           | <b>186</b>  | HG 28           | 12.50      | 4             | MR           | <b>211</b>  | HG 86           | 46.25      | 7             | S            |
| <b>162</b>  | PLS 6279        | 42.50      | 7             | S            | <b>187</b>  | HG 30           | 18.00      | 5             | MS           | <b>212</b>  | HG 90           | 12.50      | 4             | MR           |
| <b>163</b>  | PLS 6280        | 27.50      | 6             | S            | <b>188</b>  | HG 31           | 18.75      | 5             | MS           | <b>213</b>  | HG 92           | 47.75      | 7             | S            |
| <b>164</b>  | PLS 6281        | 17.00      | 5             | MS           | <b>189</b>  | HG 34           | 40.00      | 7             | S            | <b>214</b>  | HG 93           | 18.75      | 5             | MS           |
| <b>165</b>  | [PLS 6282       | 18.75      | 5             | MS           | <b>190</b>  | HG 35           | 43.75      | 7             | S            | <b>215</b>  | HG 94           | 13.00      | 5             | MS           |
| <b>166</b>  | PLS 6055        | 43.75      | 7             | S            | <b>191</b>  | HG 36           | 48.75      | 7             | S            | <b>216</b>  | HG 95           | 17.00      | 5             | MS           |
| <b>167</b>  | PLS 6132        | 48.75      | 7             | S            | <b>192</b>  | HG 37           | 26.25      | 6             | S            | <b>217</b>  | HG 96           | 48.75      | 7             | S            |
| <b>168</b>  | PLS 6117        | 19.00      | 5             | MS           | <b>193</b>  | HG 38           | 16.00      | 5             | MS           | <b>218</b>  | HG 101          | 12.50      | 4             | MR           |
| <b>169</b>  | PLS 6096        | 12.50      | 4             | MR           | <b>194</b>  | HG 41           | 18.75      | 5             | MS           | <b>219</b>  | HG 112          | 42.50      | 7             | S            |
| <b>170</b>  | PLS 6018        | 18.75      | 5             | MS           | <b>195</b>  | HG 43           | 45.00      | 7             | S            | <b>220</b>  | HG 114          | 19.00      | 5             | MS           |
| <b>171</b>  | PLS 6070        | 46.25      | 7             | S            | <b>196</b>  | HG 47           | 48.75      | 7             | S            | <b>221</b>  | HG 115          | 42.75      | 7             | S            |
| <b>172</b>  | HG 2            | 40.00      | 7             | S            | <b>197</b>  | HG 50           | 18.75      | 5             | MS           | <b>222</b>  | HG 116          | 46.75      | 7             | S            |
| <b>173</b>  | HG 4            | 48.75      | 7             | S            | <b>198</b>  | HG 54           | 12.50      | 4             | MR           | <b>223</b>  | HG 119          | 44.25      | 6             | S            |
| <b>174</b>  | HG 5            | 18.75      | 5             | MS           | <b>199</b>  | HG 57           | 18.75      | 5             | MS           | <b>224</b>  | HG 120          | 12.50      | 4             | MR           |
| <b>175</b>  | HG 5A           | 18.00      | 5             | MS           | <b>200</b>  | HG 58           | 40.00      | 6             | S            | <b>225</b>  | HG 121          | 43.75      | 7             | S            |

Supplementary Table S1 Contd.,

| S.No       | Genotype | PDI   | Rating | Group | S.No       | Genotype | PDI   | Rating | Group | S.No       | Genotype        | PDI   | Rating | Group |
|------------|----------|-------|--------|-------|------------|----------|-------|--------|-------|------------|-----------------|-------|--------|-------|
| <b>226</b> | HG 121-4 | 18.75 | 5      | MS    | <b>235</b> | 2416082  | 12.50 | 4      | MR    | <b>244</b> | 2447523         | 12.50 | 4      | MR    |
| <b>227</b> | HG 122   | 31.25 | 7      | S     | <b>236</b> | 2416112  | 43.75 | 7      | S     | <b>245</b> | 2447889         | 48.75 | 7      | S     |
| <b>228</b> | HG 125   | 48.75 | 7      | S     | <b>237</b> | 2416171  | 46.25 | 7      | S     | <b>246</b> | 2448987         | 46.25 | 7      | S     |
| <b>229</b> | HG 204   | 42.50 | 7      | S     | <b>238</b> | 2416446  | 42.50 | 7      | S     | <b>247</b> | 2448984         | 50.00 | 7      | S     |
| <b>230</b> | HG 376   | 13.25 | 4      | MR    | <b>239</b> | 2448985  | 43.00 | 7      | S     | <b>248</b> | 2449350         | 18.75 | 5      | MS    |
| <b>231</b> | HG 473   | 42.50 | 7      | S     | <b>240</b> | 2449349  | 19.00 | 5      | MS    | <b>249</b> | 2447858         | 19.00 | 5      | MS    |
| <b>232</b> | 2415016  | 19.00 | 5      | MS    | <b>241</b> | 2449351  | 48.75 | 7      | S     | <b>250</b> | 2449320         | 43.75 | 7      | S     |
| <b>233</b> | 2415443  | 18.75 | 5      | MS    | <b>242</b> | 2449352  | 31.25 | 7      | S     | <b>251</b> | PAIYUR 2        | 12.25 | 4      | MR    |
| <b>234</b> | 2415806  | 17.00 | 5      | MS    | <b>243</b> | 2447527  | 46.75 | 7      | S     | <b>252</b> | CRIDA 1-<br>18R | 12.50 | 3      | MR    |
|            |          |       |        |       |            |          |       |        |       |            | HG 22: SC       | 75.00 | 7      | HS    |

S- Susceptible

MS: Moderately susceptible

HS: Highly susceptible

MR: Moderately resistant

HR: Highly Resistant

SC: Susceptible check
